# Supplementary material for: Identification and characterization of a spotted-leaf mutant spl40 with enhanced bacterial blight resistance in rice
Source: PubMed Central journal article supplement (PMC6708518; doi:10.1186/s12284-019-0326-6), 2019-08-24
Supplement: 12284_2019_326_MOESM2_ESM.pdf [file 12284_2019_326_MOESM2_ESM.pdf]

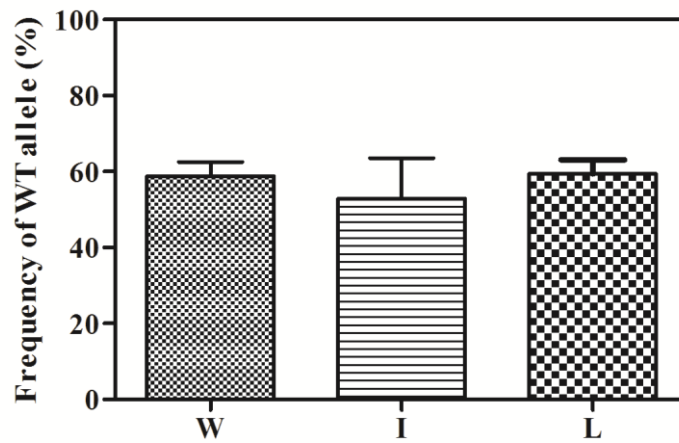

**Figure S1.** Frequency of WT *SPL40* allele in the T<sub>1</sub> generation of complementary plants. Wild type (W), intermediate type (I) and Lesion mimic type (L). Values are means  $\pm$ SD of three biological repeats and are subjected to one-way ANOVA followed by the Duncan multiple range test.

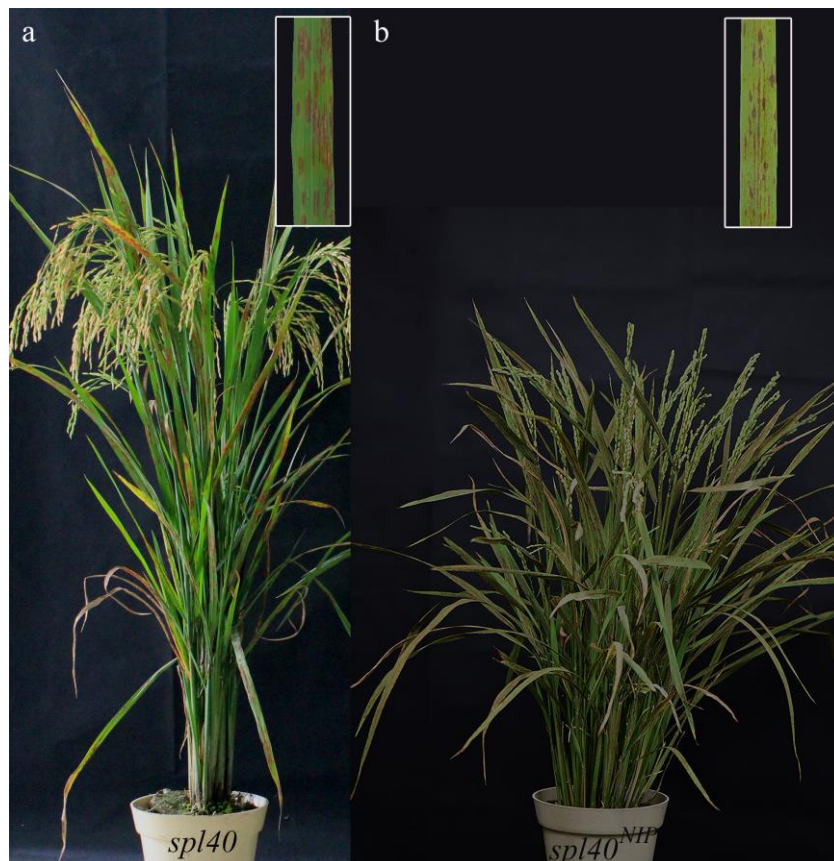

**Figure S2** Phenotype of *spl40* and *spl40*<sup>NIP</sup>. (a) Phenotype of *spl40*; (b) Phenotype of *spl40*<sup>NIP</sup>
